# Supplementary material for: Pedagogical Design Considerations for Mobile Augmented Reality Serious Games (MARSGs): A Literature Review
Source: MDPI journal article supplement (doi:10.3390/electronics12214524), 2023-11-03
Supplement: s1 [file s1]

**Supplementary Table S1: Paper demographics.** Included works and their publication year, number of participants, reported participant demographics, and the country of the 1<sup>st</sup> author's institution. Brackets refer to the citation within the supplemental materials while parentheses refer to the citation number on the main paper.

| Citation  | Authors                                                                                                                 | Year | No. of Participants | Sample                                                                                                      | Country                  |
|-----------|-------------------------------------------------------------------------------------------------------------------------|------|---------------------|-------------------------------------------------------------------------------------------------------------|--------------------------|
| [1] (63)  | Alqahtani, H., & Kavakli-Thorne, M.                                                                                     | 2020 | 91                  | Age: 16 to 65, Gender: 38 female, 53 male                                                                   | Australia                |
| [2] (64)  | Bressler, D. M., & Bodzin, A. M.                                                                                        | 2013 | 68                  | Age: 11 to 15, Gender: 33 female, 35 male                                                                   | United States of America |
| [3] (64)  | Bressler, Denise M.<br>Shane Tutwiler, M.<br>Bodzin, Alec M.                                                            | 2021 | 68<br>208<br>110    | 6 <sup>th</sup> , 7 <sup>th</sup> , 8 <sup>th</sup> grade<br>8 <sup>th</sup> grade<br>8 <sup>th</sup> grade | United States of America |
| [4] (18)  | Carlos-Chullo, J. D., Vilca-Quispe, M., & Castro-Gutierrez, E.                                                          | 2021 | 21                  | Age: 10 to 12, Gender: 11 female, 10 male; 5 female, male for intervention; 5 female, 5 male for control    | Peru                     |
| [5] (65)  | Cauchi, M., & Scerri, D.                                                                                                | 2019 | 6                   | Age: 11 to 60+, Gender: Unreported                                                                          | Malta                    |
| [6] (62)  | Farella, Mariella; Taibi, Davide; Arrigo, Marco; Todaro, Giovanni; Fulantelli, Giovanni Chiazzese, Giuseppe             | 2021 | 30                  | Aged 11-14 years                                                                                            | Italy                    |
| [7] (66)  | Fitz-walter, Z., Tjondronegoro, D., Koh, D., & Zrobok, M.                                                               | 2007 | 7                   | Age: 6 to 14, Gender: Unreported                                                                            | Australia                |
| [8] (67)  | Francesce, R., Risi, M., Siani, R., & Tortora, G.                                                                       | 2018 | 14                  | Age: 16, Gender: Unreported                                                                                 | Italy                    |
| [9] (28)  | Gardeli, A., & Vosinakis, S.                                                                                            | 2019 | 26                  | Age: 9 to 10, Gender: 11 female, 15 male                                                                    | Greece                   |
| [10] (68) | Hou, H., & Lin, Y.-C.                                                                                                   | 2017 | 52                  | Age: Avg. 17, Gender: 10 female, 42 male                                                                    | Taiwan, China            |
| [11] (69) | I. Di Loreto, M. Divitini, I. Trimailovas, M. Mander                                                                    | 2013 | 9                   | Age: Avg. 18, Gender unreported                                                                             | Italy                    |
| [12] (50) | Kalmpourtzis, G., Aristotle, M., & Berthoix, M.                                                                         | 2015 | 20                  | <i>Unreported</i>                                                                                           | Greece                   |
| [13] (51) | Nisi, V., Cesario, V., & Nunes, N.                                                                                      | 2021 | 16                  | Age: avg 17.25, Gender: 2 female, 14 male                                                                   | Portugal                 |
| [14] (31) | Noreikis, M., Savela, N., Kaakinen, M., Xiao, Y., & Oksanen, A.                                                         | 2019 | 176                 | Age: avg. 35.94, Gender: 98 female, 78 male (16 female, 16 male for interview)                              | Finland                  |
| [15] (52) | Parsons, D., & Petrova, K.                                                                                              | 2012 | 14                  | <i>Unreported</i>                                                                                           | New Zealand              |
| [16] (53) | Patricio, J. M., Costa, M. C., & Manso, A.                                                                              | 2019 | 70                  | Primary school (age and gender not reported)                                                                | Portugal                 |
| [17] (54) | Petridis, P., Dunwell, I., Liarakis, F., Constantinou, G., Arnab, S., Freitas, S. De, Hendrix, M., Worlds, I., & Cv, C. | 2013 | 5                   | <i>Unreported</i>                                                                                           | England                  |
| [18] (55) | Pokric, B., Krc, S., Pokric, M., Knezevic, P., & Jovanovic, D.                                                          | 2015 | 19                  | <i>Unreported</i>                                                                                           | Serbia                   |
| [19] (56) | Pombo, L., & Marques, M. M.                                                                                             | 2019 | 244                 | Age: 10 to 16, Gender: 126 female, 118 male                                                                 | Portugal                 |
| [20] (57) | Rapp, D., Muller, J., Bucher, K., & von Mammen, S.                                                                      | 2018 | 23                  | Age: avg. 22, Gender 10 female, 9 male, 4 unidentified                                                      | Germany                  |
| [21] (61) | Reisinho, Pedro<br>Silva, Catia<br>Vairinhos, Mario<br>Oliveira, Ana Patricia<br>Zagalo, Nelson                         | 2021 | 5                   | 10-12 years old, 5 female                                                                                   | Portugal                 |
| [22] (58) | Rogers, K., Frommel, J., Breier, L., Celik, S., Kramer, H., Kreidel, S., Brich, J., Riemer, V., & Schrader, C.          | 2015 | 30                  | Age: avg. 23.13, Gender: 11 female, 19 male                                                                 | Germany                  |
| [23] (59) | Stefanidi, E., Arampatzis, D., Leonidis, A., Korozi, M., Antona, M., & Papagiannakis, G.                                | 2020 | 10                  | Age: 7 to 12, Gender: 4 female and 6 male                                                                   | Greece                   |

**Supplementary Table S2: Game Details.** This table denotes the abstracted game subjects, game elements, instructional elements, and the explicitly stated pedagogical theories utilized. Brackets refer to the citation within the supplemental materials while parentheses refer to the citation number on the main paper.

| Citation  | Game Title                                                                   | Game's Educational Subject                              | Gamified Elements                                                                                                                                                     | Instructional Elements                                                         | Instructional Game Elements | Theories / Frameworks                                                                   |
|-----------|------------------------------------------------------------------------------|---------------------------------------------------------|-----------------------------------------------------------------------------------------------------------------------------------------------------------------------|--------------------------------------------------------------------------------|-----------------------------|-----------------------------------------------------------------------------------------|
| [1] (63)  | <i>CybaR</i>                                                                 | Cyberattacks and how to avoid them and stay safe online | Goals, points (rewards and threats (deductions)), achievements, leaderboards                                                                                          | Quizzes, prompts to replay if 65% base not met, positive and negative feedback | Replayability               | Constructivism, inquiry-based                                                           |
| [2] (64)  | <i>School Scene Investigators: The Case of the Stolen Score Sheets (SSI)</i> | Forensic science                                        | Narrative, search, inquiry problem solving, collection, teamwork, win state, alerts, quests                                                                           |                                                                                |                             | Flow theory, jigsaw pedagogy, constructivist approach, situated learning theory         |
| [3] (64)  | <i>School Scene Investigators (Score Sheets, Mystery Powder)</i>             | Forensic Science                                        | Narrative, search, collection, teamwork, quest                                                                                                                        | Real-time feedback                                                             |                             | Flow theory, jigsaw pedagogy, inquiry based                                             |
| [4] (18)  | <i>Voluminis</i>                                                             | Geometry volume formulae                                | Points (rewards and threats), bartering (can exchange points for hints), narrative                                                                                    | Real-time instructor monitoring, scores sent to instructor                     | Hints, replayability        | Geometric theory                                                                        |
| [5] (65)  | <i>Untitled</i>                                                              | Cultural heritage tour content                          | Search, points (rewards and threats), clues                                                                                                                           | Quizzes                                                                        | Hints                       | Gardner's theory of multiple intelligences                                              |
| [6] (62)  | <i>Treasure hunt (we respect our earth)</i>                                  | Climate change and environmental stability              | Clues, search, tangible pieces, teamwork, real reward, goal                                                                                                           | Quizzes                                                                        |                             |                                                                                         |
| [7] (66)  | <i>Secret SLQ</i>                                                            | Local library resources                                 | Search, clues, leaderboard, points (reward), challenge, goals, interaction, achievement                                                                               | Quizzes                                                                        |                             |                                                                                         |
| [8] (67)  | <i>HGG (Hunting Game Generator)</i>                                          | Cross-subject lesson content developed by teacher       | Search, real world reward (highest scorer gets 1% boost to course grade), points, narrative, clues                                                                    | Quizzes                                                                        | Hints                       | Inquiry based learning                                                                  |
| [9] (28)  | <i>ARQuest</i>                                                               | Computational thinking skills                           | Goals, team vs. team, competition, narrative, constraints, and real world game tokens and board                                                                       | Real-time feedback                                                             |                             | Game-Based Learning (Gameplay approach) a constructivist approach, physical programming |
| [10] (68) | <i>O2LAB</i>                                                                 | Chemistry experiments                                   | Clues, teamwork, search, creation, goal                                                                                                                               | Real-time feedback                                                             |                             | Anchored instruction theory                                                             |
| [11] (69) | <i>MagMAR</i>                                                                | Museum Content                                          | Points, competition, teamwork, rule creation, search                                                                                                                  | Real-time monitoring                                                           |                             |                                                                                         |
| [12] (50) | <i>Serious+</i>                                                              | Mathematics                                             | Teamwork, search, problem solving, narrative, physical movement, tangible objects                                                                                     |                                                                                | Hints                       |                                                                                         |
| [13] (51) | <i>Memories of Carvalhal's Palace – Haunted Encounters</i>                   | Museum content                                          | Narrative, clues, search, points (reward), reward for completion (digital token), problem solving, 3D model interaction, replayable with a different narrative, quest | Quizzes                                                                        | Hints, replayability        | Constructivism                                                                          |

|           |                                    |                                                   |                                                                                                                                                                                                                       |                                                                                                                       |                      |                                                                                                           |
|-----------|------------------------------------|---------------------------------------------------|-----------------------------------------------------------------------------------------------------------------------------------------------------------------------------------------------------------------------|-----------------------------------------------------------------------------------------------------------------------|----------------------|-----------------------------------------------------------------------------------------------------------|
| [14] (31) | <i>ARQuiz</i>                      | Exhibition content                                | Search, hints, points (reward, no removal of points but possible to get 0), breadcrumbs (hints from other users, can reply to and leave own hints too. Live or off-line conversation supported. Labeled as messaging) | Quizzes, hints                                                                                                        | Hints                |                                                                                                           |
| [15] (52) | <i>Untitled</i>                    | Managerial level decisions and work               | Identification, 'interview,' search, collection, problem solving, teamwork, decision tree                                                                                                                             |                                                                                                                       |                      |                                                                                                           |
| [16] (53) | <i>PlanetarySystemGO</i>           | Astronomy concepts and celestial bodies           | Points (reward), search, high scores                                                                                                                                                                                  | Quizzes                                                                                                               |                      |                                                                                                           |
| [17] (54) | <i>Priory Undercroft; The Game</i> | Cultural heritage surrounding monastery monk life | search, clues, decision tree, physical movement, NPC's                                                                                                                                                                | Quizzes                                                                                                               |                      |                                                                                                           |
| [18] (55) | <i>Arvatar</i>                     | Air quality and pollution                         | Points (reward), leaderboard, a daily game with accumulating points, animal avatars                                                                                                                                   | Quizzes                                                                                                               |                      |                                                                                                           |
| [19] (56) | <i>EduPARK</i>                     | Local flora and fauna                             | Search, time limit, riddles, clues, points (reward), point exchange for hints (bartering)                                                                                                                             | Quiz                                                                                                                  |                      | Game-based learning; constructivist theories of contextualized and authentic learning (situated learning) |
| [20] (57) | <i>Pathomon</i>                    | Viruses                                           | Search, crafting, fight monsters, teamwork, experience points, collection, shared global leaderboard                                                                                                                  | Unlockable information, text information linked viruses. Game mechanics support virus characteristics (player spread) |                      | Biological information theory,                                                                            |
| [21] (61) | <i>FlavourGame</i>                 | Nutritional literacy                              | Narrative, competition, tangible pieces, collection, creation, bartering, reward (power ups), quest, threat                                                                                                           | Quizzes, real-time feedback                                                                                           | Hints, replayability |                                                                                                           |
| [22] (58) | <i>UniRallye</i>                   | Familiarization with new physical environment     | Goal, search, rewards, collection, leaderboard                                                                                                                                                                        | Quizzes                                                                                                               | Hints                |                                                                                                           |
| [23] (59) | <i>MagiPlay</i>                    | Programming                                       | Rule-creation, collection, potential teamwork, and shared workspace                                                                                                                                                   | Real-time feedback, program simulation, rule deployment                                                               |                      | LECTOR framework                                                                                          |

**Supplementary Table S3: Study Breakdown.** This table outlines the reported aims of each study, their study design, findings, reported future work, and reported limitations. Brackets refer to the citation within the supplemental materials while parentheses refer to the citation number on the main paper.

| Citation | Aims/objectives of study                                                                                                                  | Research design                                                                                                       | Findings                                                                                                                                                                                                                                                              | Reported Future Work                                                                                                                                                     | Reported limitations      |
|----------|-------------------------------------------------------------------------------------------------------------------------------------------|-----------------------------------------------------------------------------------------------------------------------|-----------------------------------------------------------------------------------------------------------------------------------------------------------------------------------------------------------------------------------------------------------------------|--------------------------------------------------------------------------------------------------------------------------------------------------------------------------|---------------------------|
| [1] (63) | Increase awareness of cybersecurity in safe environment leveraging AR. To overcome shortfalls of web-based cybersecurity education games. | Pre/post surveys capturing perceived learning outcomes and perception of CybAR                                        | Participants reported that CybAR was a fun and effective way to learn about cybersecurity. Participants were also motivated to learn more about cybersecurity outside of the game. The game elements were essential and better than only reading about cybersecurity. | Larger sample size, long-term post evaluation to assess retention, improve the game with more gamified elements, implementation of narrative and game refinement theory. | Sample size               |
| [2] (64) | Assess whether teen users of vision-based AR games experience 'flow' in learning                                                          | Pre/post surveys, field observation, group interviews to capture features of flow (if presented) and the relationship | Participants experienced a sense of discovery, flashes of intensity, and a drive for higher performance. Game potentially increases interest and affords learning of collaboration skills.                                                                            | Investigate scalability, and gender effects                                                                                                                              | Generalizability concerns |

|           |                                                                                                                                                                         |                                                                                                                                                                                         |                                                                                                                                                                                                                                                              |                                                                                                                                                    |                                                                                                                                                 |
|-----------|-------------------------------------------------------------------------------------------------------------------------------------------------------------------------|-----------------------------------------------------------------------------------------------------------------------------------------------------------------------------------------|--------------------------------------------------------------------------------------------------------------------------------------------------------------------------------------------------------------------------------------------------------------|----------------------------------------------------------------------------------------------------------------------------------------------------|-------------------------------------------------------------------------------------------------------------------------------------------------|
|           |                                                                                                                                                                         | of science interest, gaming attitude, and gender have on flow experience                                                                                                                | Participants experienced flow and were highly engaged.                                                                                                                                                                                                       |                                                                                                                                                    |                                                                                                                                                 |
| [3] (64)  | Promote flow and subject interest to understand if increased flow denotes triggered science interest                                                                    | Post-surveys about flow and interest, also general game feedback.                                                                                                                       | Students with higher flow states indicate higher triggered scientific interest.                                                                                                                                                                              | Integrate flow measurements during gameplay. Interest eval pre/post/distal. Better generalizability.                                               | Correlational study so directionality is unclear. Need more robust outcome measures. Limited generalizability. Did not assess group membership. |
| [4] (18)  | Leverage AR modality to afford 3D interaction for spatial geometry (object volume) to support student learning, and to support instructors through real-time monitoring | Pre/post measures of performance between control group (regular instruction) and mobile AR serious game (MARSG) group. Post participant reported perception of Voluminis                | No difference between control and intervention, but both control and intervention reported significant improvement in geometry scores. Intervention participants reported higher motivation to learn about geometry and a desire to access the game at home. | Include more interaction methods, perhaps different visualizations (ice cream orb on cone, calculate the volume of both separately, etc.)          | Some students were clicking answers randomly, some did not understand what surfaces to use AR on                                                |
| [5] (65)  | Leverage MARSG to improve tourist experience and enrich learning                                                                                                        | Pre/post interviews, game data, and tracking log of game history. Assessing use and perception of game enjoyment and usefulness                                                         | Participants reported having a more enjoyable experience than a standard tour and that AR is helpful for learning.                                                                                                                                           | Markerless AR for tours                                                                                                                            | Scalability of results                                                                                                                          |
| [6] (62)  | Understand student experiences of ARLectico built games                                                                                                                 | Semistructured interviews                                                                                                                                                               | Increased reported engagement and positive attitude.                                                                                                                                                                                                         |                                                                                                                                                    | Quantitative analysis of AR effectiveness                                                                                                       |
| [7] (66)  | Understand and improve engagement of children with library, understand how MARSG can support this goal                                                                  | Informal post-intervention feedback to capture enjoyability of experience and improvements.                                                                                             | MGAR is usable for delivering experience, but large environments should be carefully considered                                                                                                                                                              | Collect more feedback from users                                                                                                                   |                                                                                                                                                 |
| [8] (67)  | Create a game-building tool for instructors to use to teach and motivate students                                                                                       | Post-intervention semi-structured focus groups. Capturing participant perception of HGG learning modality                                                                               | Participants felt HGG was useful and improved their knowledge. Participants also report that HGG should be integrated into traditional teaching. Participants reported higher interest and enjoyment.                                                        | Evaluate teacher perception and technology acceptance. Consider the use of the tool by students to develop games as a learning exercise in itself. | Threat of focus group bias (though tried to mitigate).                                                                                          |
| [9] (28)  | Examine impact of a MARSG on computational thinking skill development and collaboration                                                                                 | Post survey capturing enjoyment, learnability, collaboration, and interactivity. Behavioral observation recording collaboration patterns (turn taking, etc.) Gameplay decisions logged. | Participants were highly engaged with game intervention and motivated during activity. Collaboration was high. Participants have greater learning benefit with individual screens. Individual screens do not impede collaboration.                           | Examine scalability for richer environments. Additional interactivity.                                                                             | Simple game rules with small number of commands. Desks were slightly too high for students to hold device above.                                |
| [10] (68) | To reduce risk and material waste associated with chemistry labs and young learners, and understand how MARSG can support this goal                                     | Pre/post-test survey to assess learning effectiveness and flow                                                                                                                          | Integration of MARSG improves student learning. Participants experienced flow                                                                                                                                                                                | Control group and examination of student behaviors                                                                                                 |                                                                                                                                                 |

|           |                                                                                                                                                           |                                                                                                                                                                                                                          |                                                                                                                                                                                                                                                                                                                                                                  |                                                                                                                                               |                                                                                                                            |
|-----------|-----------------------------------------------------------------------------------------------------------------------------------------------------------|--------------------------------------------------------------------------------------------------------------------------------------------------------------------------------------------------------------------------|------------------------------------------------------------------------------------------------------------------------------------------------------------------------------------------------------------------------------------------------------------------------------------------------------------------------------------------------------------------|-----------------------------------------------------------------------------------------------------------------------------------------------|----------------------------------------------------------------------------------------------------------------------------|
| [11] (69) | Enhance museum fruition experience for teenagers while allowing educator monitoring                                                                       | Post-intervention surveys                                                                                                                                                                                                | Students indicated that they had fun and were strongly engaged in discussing strategy. Sociability was important and students found collaboration fun and helpful. Being able to challenge the other team improved game experience and creating questions was helpful to learn more about the museum materials. AR may have been distracting due to limitations. | Monitoring element of MagMar should be further investigated. More extensive trials with more students should be done.                         |                                                                                                                            |
| [12] (50) | The effectiveness of MARSg and technology integration into the classroom for mathematic instruction                                                       | Game data recorded, observational, to capture engagement and teamwork                                                                                                                                                    | Participants display a higher average performance in the post evaluation of their mathematical skill. Participants also had higher motivation to stay in classroom and spent more time than peers outside of intervention on mathematical concepts. Participants also attained higher difficulty levels by the end of the intervention                           | Record conversations of students to better capture their discussions                                                                          |                                                                                                                            |
| [13] (51) | Determine if MARSg promotes engagement of teenage visitors in the museum experience, thus enhancing learning. Hoping to improve teen interest in museums. | Post-intervention surveys                                                                                                                                                                                                | Participants felt the game added value to the museum experience, thus resulting in improved motivation and engagement.                                                                                                                                                                                                                                           | Balance difficulty of challenges with hints. Continue evaluation of the game with a better gender-balanced sample, within the museum setting. | Small sample, had to use museum reproduction for questionnaire process                                                     |
| [14] (31) | Examine impacts of MARSg in public venues                                                                                                                 | Pre/post surveys, recorded semi-structured interviews (limited participants: 28). Real-time data during play. Capturing usage, perceived enjoyment of the app, exhibition, and quizzes, and perceived usefulness of game | Participants reported positive learning experiences that AR could improve learning and make it more enjoyable. Authors found that the more participants felt the content was useful and enjoyable, the more likely they were to have high quiz scores, and to have higher sociability after the game.                                                            | Privacy concerns must be addressed.                                                                                                           | Participant added hints were not consistent across study days. Participants reported finding the quiz questions difficult. |
| [15] (52) | Create a reusable learning tool for business related work that is freely available, and easily deployable                                                 | Post-intervention survey to capture game perception, and interview                                                                                                                                                       | Participants found the game engaging and motivating, and were successful at desired skill development by the end                                                                                                                                                                                                                                                 | Adjust game for better team activity                                                                                                          | The current iteration did not support team elements well                                                                   |
| [16] (53) | Evolve SolarSystemGo from web-based to MAR                                                                                                                | Post-intervention survey to capture enjoyment, perception of the experience, whether the game fulfills learning requirements                                                                                             | Teacher participants report that the game fulfills the requirements of the syllabus. Student participants report enjoyable experiences and that they would play the game again.                                                                                                                                                                                  |                                                                                                                                               |                                                                                                                            |
| [17] (54) | Creation and evaluation of immersive museum experience through MARSg                                                                                      | Post-intervention survey and saved game data to capture user engagement and perception                                                                                                                                   | Participants state they prefer playing and learning simultaneously and that MARSg helped them understand and learn                                                                                                                                                                                                                                               |                                                                                                                                               |                                                                                                                            |
| [18] (55) | Develop novel MARSg using IoT to raise awareness about environmental issues                                                                               | Post-intervention survey to capture perceived entertainment, intuitiveness, and use                                                                                                                                      | Participants believe that the game is educational and entertaining (no significant results, however)                                                                                                                                                                                                                                                             |                                                                                                                                               |                                                                                                                            |
| [19] (56) | Assess participant perception of mobile devices for learning and                                                                                          | Post-intervention survey to capture advantages to                                                                                                                                                                        | Participants report positive perspectives of mobile learning, stating that it is motivating. App                                                                                                                                                                                                                                                                 |                                                                                                                                               | Participants may have been overexcited at the                                                                              |

|           |                                                                                                 |                                                                                                                                                                     |                                                                                                                                                                  |                                                                                                            |                                                                                                                                              |
|-----------|-------------------------------------------------------------------------------------------------|---------------------------------------------------------------------------------------------------------------------------------------------------------------------|------------------------------------------------------------------------------------------------------------------------------------------------------------------|------------------------------------------------------------------------------------------------------------|----------------------------------------------------------------------------------------------------------------------------------------------|
|           | the value of a MARSG within formal and informal contexts                                        | mobile learning, perceived ease of use, motivation, and fun. Gameplay data collected.                                                                               | data revealed high educational value through good performance and student engagement.                                                                            |                                                                                                            | time of survey collection as they took place immediately post conclusion of a timed game. Team composition may also play a role in app data. |
| [20] (57) | Use MARSG to support virus education. Understand emotional impact of game                       | Post-intervention survey with subset of players to assess flow, competence, challenge, positive and negative affect, tension, and sensory and imaginative immersion | Participants report the game was too hard, but high competence. Participants also report immersion and positive affect when playing.                             | Examine effectiveness of learning, further development of game                                             | Technical issues                                                                                                                             |
| [21] (61) | Evaluate prototype usability and whether an AR game could transmit knowledge of cooking habits. | Pre/post surveys and observation.                                                                                                                                   | Difficulty in holding phone and cards. 80% wanted to continue playing until they won the challenge (quest). Participants had success in learning cooking habits. |                                                                                                            | Iterate on game, fix elements not well understood by participants.                                                                           |
| [22] (58) | Proposal and evaluation of a MARSG focused on navigation and learning a new environment         | Pre/post surveys to capture motivation and affinity for technology                                                                                                  | Participants rated the usefulness of the game as very satisfying. Open-ended comments report positive feedback                                                   | Closer look at motivation. Efficacy needs to be evaluated too.                                             |                                                                                                                                              |
| [23] (59) | Effectiveness of leveraging MARSG and intelligent environments to teach programming             | Observation of children using system, post-intervention survey to capture perception, engagement, and possible changes                                              | Participants were positively engaged, enjoyed the game, and showed enthusiasm.                                                                                   | Explore ways to enable MagiPlay's simulation feature as a debugging facility. Further feedback development | Simple If-Then rules used                                                                                                                    |

## References

- Alqahtani, H.; Kavakli-Thorne, M. Design and Evaluation of an Augmented Reality Game for Cybersecurity Awareness (CybAR). *Information* **2020**, *11*, 121. <https://doi.org/10.3390/info11020121>.
- Bressler, D.; Bodzin, A. A mixed methods assessment of students' flow experiences during a mobile augmented reality science game. *J. Comput. Assist. Learn.* **2013**, *29*, 505–517. <https://doi.org/10.1111/jcal.12008>.
- Bressler, D.M.; Tutwiler, M.S.; Bodzin, A.M. Promoting student flow and interest in a science learning game: A design-based research study of School Scene Investigators. *Educ. Technol. Res. Dev.* **2021**, *69*, 2789–2811. <https://doi.org/10.1007/s11423-021-10039-y>.
- Carlos-Chullo, J.D.; Vilca-Quispe, M.; Castro-Gutierrez, E. Voluminis: An Augmented Reality Mobile System in Geometry Affording Competence to Evaluating Math Comprehension. *Adv. Intell. Syst. Comput.* **2021**, *1231*, 288–299. [https://doi.org/10.1007/978-3-030-52575-0\\_23](https://doi.org/10.1007/978-3-030-52575-0_23).
- Cauchi, M.; Scerri, D. Enriching Tourist UX via a Location Based AR Treasure Hunt Game. In Proceedings of the 2019 IEEE 9th International Conference on Consumer Electronics (ICCE-Berlin), Berlin, Germany, 8–11 September 2019; pp. 199–204. <https://doi.org/10.1109/ICCE-Berlin47944.2019.8966141>.
- Farella, M.; Taibi, D.; Arrigo, M.; Todaro, G.; Fulantelli, G.; Chiazzese, G. An augmented reality mobile learning experience based on treasure hunt serious game. In Proceedings of the ECEL 2021 20th European Conference on E-Learning, Berlin, Germany, 28–29 October 2021; Academic Conferences International limited: Manchester, UK, 2021; pp. 148–154. <https://doi.org/10.34190/EEL.21.109>.
- Fitz-walter, Z.; Tjondronegoro, D.; Koh, D.; Zrobok, M. Mystery at the Library: Encouraging Library Exploration using a Pervasive Mobile Game. In Proceedings of the OzCHI'12: Proceedings of the 24th Australian Computer-Human Interaction Conference, Melbourne, Australia, 26–30 November 2007; pp. 142–145.
- Francese, R.; Risi, M.; Siani, R.; Tortora, G. Augmented Treasure Hunting Generator for Edutainment. In Proceedings of the 2018 22nd International Conference Information Visualisation (IV), Fisciano, Italy, 10–13 July 2018; pp. 524–529. <https://doi.org/10.1109/iV.2018.00097>.
- Gardeli, A.; Vosinakis, S. ARQuest: A Tangible Augmented Reality Approach to Developing Computational Thinking Skills. In Proceedings of the 2019 11th International Conference on Virtual Worlds and Games for Serious Applications (VS-Games), Vienna, Austria, 4–6 September 2019; p. 8.

10. Hou, H.-T.; Lin, Y.-C. The Development and Evaluation of an Educational Game Integrated with Augmented Reality and Virtual Laboratory for Chemistry Experiment Learning. In Proceedings of the 2017 6th IIAI International Congress on Advanced Applied Informatics (IIAI-AAI), Hamamatsu, Japan, 9–13 July 2017; pp. 1005–1006. <https://doi.org/10.1109/IIAI-AAI.2017.14>.
11. Di Loreto, I.; Divitini, M.; Trimailovas, I.; Mander, M. Playing in museums by constructing your game. In Proceedings of the Workshop Proceedings of the 9th International Conference on Intelligent Environments, Athens, Greece, 16–17 July 2013; IOS Press: Amsterdam, The Netherlands, 2013; Volume 17, pp. 519–529. <https://doi.org/10.3233/978-1-61499-286-8-519>.
12. Kalmpourtzis, G.; Aristotle, M.; Berthoix, M. Serious+ : A technology assisted learning space based on gaming. In Proceedings of the 2015 International Conference on Interactive Mobile Communication Technologies and Learning (IMCL), Thessaloniki, Greece, 19–20 November 2015; pp. 430–432.
13. Nisi, V.; Cesario, V.; Nunes, N. Augmented Reality Museum’s Gaming for Digital Natives : Haunted Encounters in the Carvalhal’s Palace. In Proceedings of the 1st Joint International Conference on Entertainment Computing and Serious Games: ICEC-JCSG 2019, Arequipa, Peru, 11–15 November 2019; Springer: Berlin/Heidelberg, Germany, 2021; pp. 1–21.
14. Noreikis, M.; Savela, N.; Kaakinen, M.; Xiao, Y.; Oksanen, A. Effects of Gamified Augmented Reality in Public Spaces. *IEEE Access* **2019**, *7*, 148108–148118. <https://doi.org/10.1109/access.2019.2945819>.
15. Parsons, D.; Petrova, K.; Ryu, H. Mobile Gaming—A Serious Business! In Proceedings of the 2012 IEEE 7th International Conference on Wireless, Mobile and Ubiquitous Technology in Education (WMUTE), Takamatsu, Japan, 27–30 March 2012; pp. 17–24. <https://doi.org/10.1109/WMUTE.2012.11>.
16. Patricio, J.M.; Costa, M.C.; Manso, A. A Gamified Mobile Augmented Reality System for the Teaching of Astronomical Concepts. In Proceedings of the 2019 14th Iberian Conference on Information Systems and Technologies (CISTI), Coimbra, Portugal, 19–22 June 2019. <https://doi.org/10.23919/CISTI.2019.8760658>.
17. Petridis, P.; Dunwell, I.; Liarokapis, F.; Constantinou, G.; Arnab, S.; de Freitas, S.; Hendrix, M. The Herbert Virtual Museum. *J. Electr. Comput. Eng.* **2013**, *2013*, 1–8. <https://doi.org/10.1155/2013/487970>.
18. Pokric, B.; Krco, S.; Pokric, M.; Knezevic, P.; Jovanovic, D. Engaging citizen communities in smart cities using IoT, serious gaming and fast markerless Augmented Reality. In Proceedings of the 2015 International Conference on Recent Advances in Internet of Things (RIoT), Singapore, 7–9 April 2015; pp. 7–9. <https://doi.org/10.1109/RIOT.2015.7104905>.
19. Pombo, L.; Marques, M.M. Improving students’ learning with a mobile augmented reality approach—The EduPARK game. *Interact. Technol. Smart Educ.* **2019**, *16*, 392–406. <https://doi.org/10.1108/itse-06-2019-0032>.
20. Rapp, D.; Muller, J.; Bucher, K.; von Mammen, S. Pathomon: A Social Augmented Reality Serious Game. In Proceedings of the 2018 10th International Conference on Virtual Worlds and Games for Serious Applications (VS-Games), Würzburg, Germany, 5–7 September 2018; p. 4.
21. Reisinho, P.; Silva, C.; Vairinhos, M.; Oliveira, A.P.; Zagalo, N. Tangible Interfaces and Augmented Reality in a Nutrition Serious Game for Kids. In Proceedings of the 2021 IEEE 9th International Conference on Serious Games and Applications for Health (SeGAH), Dubai, United Arab Emirates, 4–6 August 2021.
22. Rogers, K.; Frommel, J.; Breier, L.; Celik, S.; Kramer, H.; Kreidel, S.; Brich, J.; Riemer, V.; Schrader, C. Mobile Augmented Reality as an Orientation Aid: A Scavenger Hunt Prototype. In Proceedings of the 2015 International Conference on Intelligent Environments (IE), Prague, Czech Republic, 15–17 July 2015; pp. 172–175.
23. Stefanidi, E.; Arampatzis, D.; Leonidis, A.; Korozi, M.; Antona, M.; Papagiannakis, G. MagiPlay: An Augmented Reality Serious Game Allowing Children to Program Intelligent Environments. *Trans. Comput. Sci. XXXVII Spec. Issue Comput. Graph.* **2020**, *12230*, 144–169.
